# Supplementary material
Source: PubMed Central journal article supplement (PMC2745345)

Supplementary figures

Figure S1

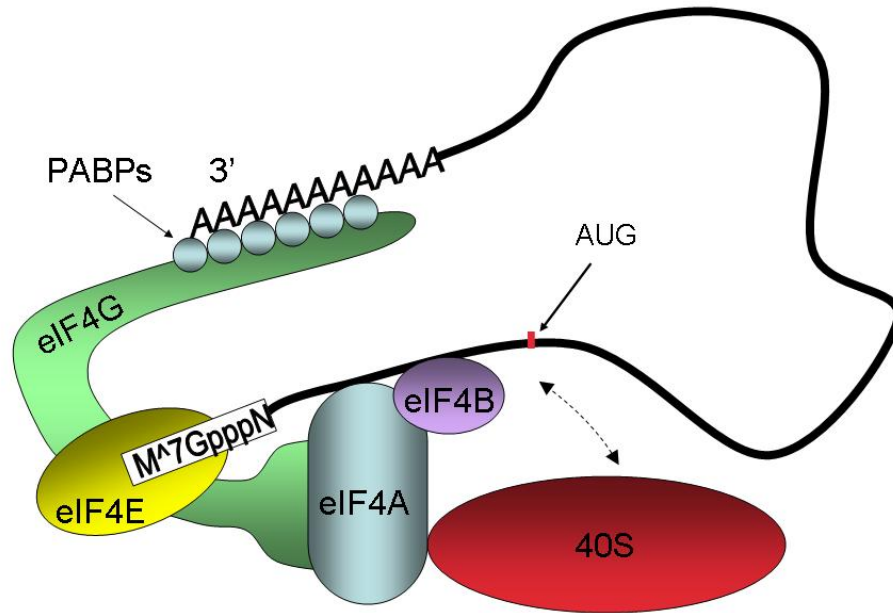

**Figure S2**

a)

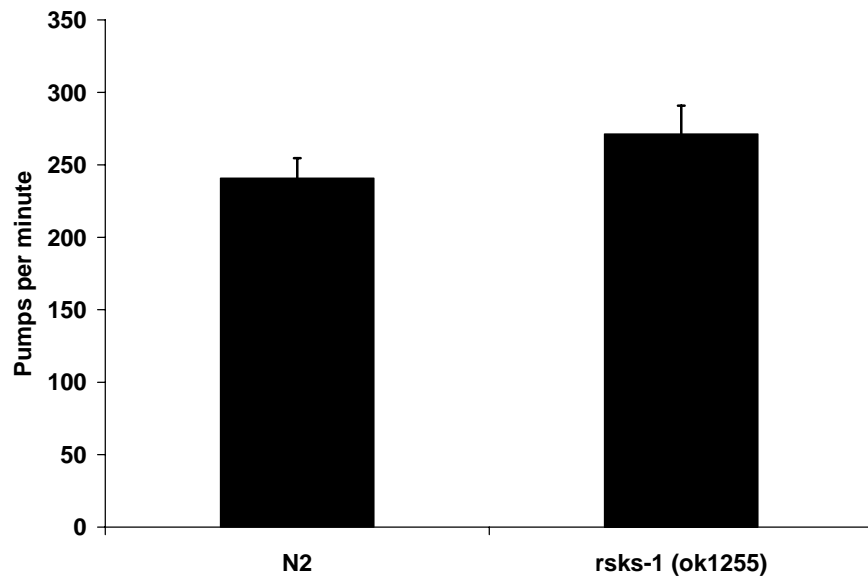

b)

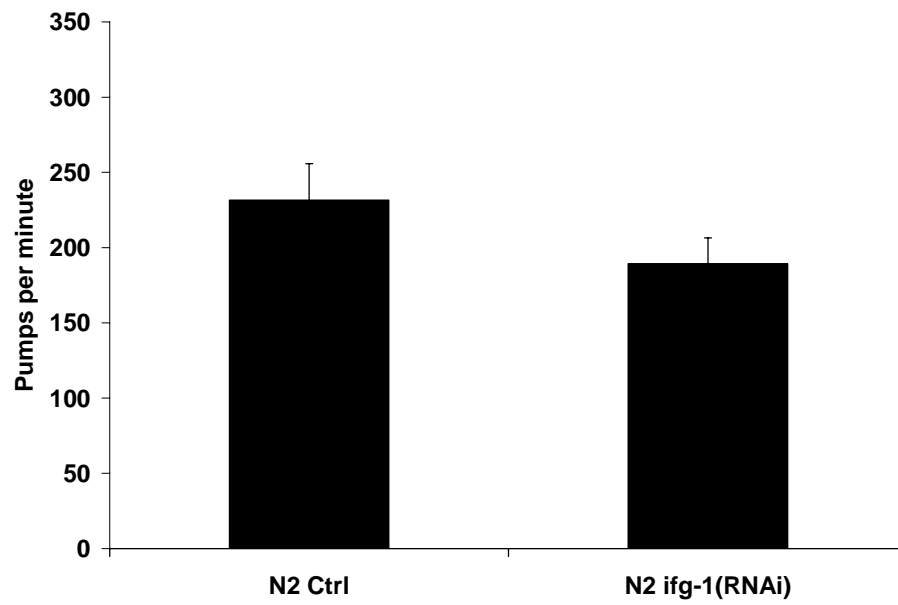

Figure S3

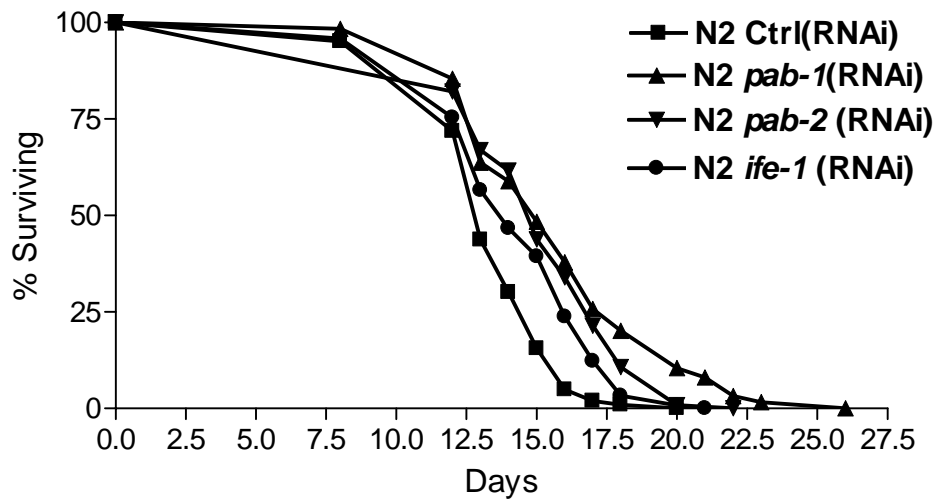

Supplement: NIHMS137888-supplement-FigS1-S3.pdf [file NIHMS137888-supplement-FigS1-S3.pdf]
